# Supplementary material for: Historical RNA expression profiles from the extinct Tasmanian tiger
Source: Genome Res. 2023 Aug;33(8):1299–316. doi: 10.1101/gr.277663.123 (PMC10552650; doi:10.1101/gr.277663.123)
Supplement: Supplement 7 [file Supplemental_Tables.xlsx]

## Sheet: Index
Supplemental Tables Index
Supplemental Table 1: RNA yield after extraction measured with QubitTM 2.0 fluorometer equipment.
Supplemental Table 2: Number of RNA reads present in each skeletal muscle and skin tissue sample and trimmed reads mapped to the thylacine nuclear genome and mitochondrial genome assemblies.
Supplemental Table 3: Number of untrimmed RNA reads present in each skeletal muscle and skin tissue sample and untrimmed reads mapped to the thylacine nuclear genome and mitochondrial genome assemblies.
Supplemental Table 4: Metatranscriptomic classification of prokaryotic species using trimmed and untrimmed RNA reads >30 nt from skeletal muscle and skin tissues according to the KrakenUniq pipeline.
Supplemental Table 5: Metatranscriptomic classification of viral species using trimmed and untrimmed RNA reads >30 nt from skeletal muscle and skin tissues according to the KrakenUniq pipeline.
Supplemental Table 6: Number of trimmed RNA reads mapped to protein-coding and other noncoding RNA genes annotated in the thylacine genome.
Supplemental Table 7: Number of utrimmed RNA reads mapped to protein-coding and other noncoding RNA genes annotated in the thylacine genome.
Supplemental Table 8: Number of trimmed RNA reads of 42 nt mapped to the thylacine and human genome.
Supplemental Table 9: Number of RNA reads mapped to exonic and intronic regions of protein-coding genes with breadth of coverage >10% of the coding sequence in skeletal muscle (N = 236) and skin (N = 270) tissues.
Supplemental Table 10: Number of RNA reads mapped to exonic and intronic regions across all annotated protein-coding genes in the thylacine genome and reads spanning exon-exon and exon-intron junctions.
Supplemental Table 11: Number of RNA reads mapped to each scaffold of the thylacine nuclear and mitochondrial genomes and their genome-wide distribution.
Supplemental Table 12: Top 20 genomic bins with the most abundant RNA sequences mapped to the skeletal muscle and skin tissues.
Supplemental Table 13: rRNA genes annotation in the thylacine genome.
Supplemental Table 14: Number of RNA reads mapped to each annotated protein-coding gene and their distribution in skeletal muscle tissue.
Supplemental Table 15: Number of RNA reads mapped to each annotated protein-coding gene and their distribution in skin tissue.
Supplemental Table 16: Most abundant protein-coding genes (breadth of coverage >10%) in skeletal muscle and skin, as well as those shared by both tissues.
Supplemental Table 17: Number of RNA reads mapped to each annotated noncoding RNA gene and their distribution in skeletal muscle tissue.
Supplemental Table 18: Number of RNA reads mapped to each annotated noncoding RNA gene and their distribution in skin tissue.
Supplemental Table 19: Most abundant noncoding RNA genes (breadth of coverage >10%) in skeletal muscle and skin, as well as those shared by both tissues.
Supplemental Table 20: Number of RNA reads mapped to each annotated mitochondrial gene and their distribution in skeletal muscle tissue.
Supplemental Table 21: Number of RNA reads mapped to each annotated mitochondrial gene and their distribution in skin tissue.
Supplemental Table 22: MicroRNA annotation in the thylacine genome using homology search, MirMachine and MirMiner algorithms.
Supplemental Table 23: MicroRNA annotation in the thylacine genome as reported by Feigin et al. 2022 and their overlap with microRNAs annotated in the current study.
Supplemental Table 24: Number of RNA reads 18-25 nt long present in each skeletal muscle and skin tissue sample and number of reads mapped to miRNA loci.
Supplemental Table 25: Number of RNA reads mapped to each annotated microRNA gene in skeletal muscle and skin tissues.
Supplemental Table 26: Number of trimmed RNA reads mapped to each 5p and 3p arm of annotated microRNA genes in skeletal muscle and skin tissues.
Supplemental Table 27: miRNAs (N = 119) and protein-coding (PC) mRNAs (N = 261) used for UMAP embeddings of extant species gene expression profiles jointly with thylacine skeletal muscle and skin RNA sequencing data.
Supplemental Table 28: Genomic coordinates of Tcy-Novel-18 miRNA candidate and its homologous miRNA sequences in other marsupial species.
Supplemental Table 29: Genomic coordinates of Tcy-Novel-16-P11 miRNA candidate and its homologous miRNA sequences in other marsupial species.
Supplemental Table 30: miRDeep2 output prediction of putative novel microRNA candidates using skeletal muscle and skin RNA sequences.
Supplemental Table 31: Number of trimmed RNA reads mapped to each annotated protein-coding gene in both thylacine and Tasmania devil species and their distribution in skeletal muscle tissue.
Supplemental Table 32: Number of trimmed RNA reads mapped to each annotated protein-coding gene in both thylacine and Tasmania devil species and their distribution in skin tissue.
Supplemental Table 33: Number of trimmed RNA reads mapped to each annotated miRNA gene in both thylacine and Tasmania devil species in skeletal muscle tissue.
Supplemental Table 34: Number of trimmed RNA reads mapped to each annotated noncoding RNA gene in both thylacine and Tasmania devil species and their distribution in skeletal muscle tissue.
Supplemental Table 35: Number of trimmed RNA reads mapped to each annotated miRNA gene in both thylacine and Tasmania devil species in skin tissue.
Supplemental Table 36: Number of trimmed RNA reads mapped to each annotated noncoding RNA gene in both thylacine and Tasmania devil species and their distribution in skin tissue.

## Sheet: Suppl_Table1
Supplemental Table 1: RNA yield after extraction measured with QubitTM 2.0 fluorometer equipment.
	QubitTM microRNA (ng/µl)			QubitTM RNA HS (ng/µl)
	Replicate 1	Replicate 2	Replicate 3	Replicate 1	Replicate 2	Replicate 3
Muscle 1	40.5	40	40.1	67.1	67	67
Muscle 2	44.7	44.7	44.7	8.6	8.6	8.6
Muscle 3	21.7	21.5	21.1	49.9	49.8	49.6
Skin 1	14.7	14.6	14.5	21.6	21.4	21.4
Skin 2	19.5	19.5	19.5	56	56	56
Skin 3	17.4	17.3	17.1	41.9	41.8	41.8

## Sheet: Suppl_Table2
Supplemental Table 2: Number of RNA reads present in each skeletal muscle and skin tissue sample and trimmed reads mapped to the thylacine nuclear genome and mitochondrial genome assemblies.
	Muscle 1	Muscle 2	Muscle 3	Muscle merged	Skin 1	Skin 2	Skin 3	Skin merged
Raw reads	81952767	98362314	137537033	317852114	223588683	122450128	101715207	447754018
Reads untrimmed (% over raw reads)	3049045 (3.72%)	3796570 (3.86%)	5774456 (4.20%)	12620071 (3.97%)	15796821 (7.07%)	4785718 (3.91%)	3794524 (3.73%)	24377063 (5.44%)
Reads trimmed (% over raw reads)	78903722 (96.28%)	94565744 (96.14%)	131762577 (95.80%)	305232043 (96.03%)	207791862 (92.93%)	117664410 (96.09%)	97920683 (96.27%)	423376955 (94.56%)
Reads trimmed >= 18 nt (% over reads trimmed)	54207638 (68.70%)	46112640 (48.76%)	94494913 (71.72%)	194815191 (63.83%)	172686913 (83.11%)	84443773 (71.77%)	63957726 (65.32%)	321088412 (75.84%)
Reads trimmed < 18 nt (% over reads trimmed)	24696084 (31.30%)	48453104 (51.24%)	37267664 (28.28%)	110416852 (36.17%)	35104949 (16.89%)	33220637 (28.23%)	33962957 (34.68%)	102288543 (24.16%)
Reads trimmed 18-30 nt (% over reads trimmed)	30181463 (38.25%)	33475932 (35.40%)	45231853 (34.33%)	108889248 (35.67%)	77241799 (37.17%)	46006822 (39.10%)	37598863 (38.40%)	160847484 (37.99%)
Reads trimmed > 30 nt (% over reads trimmed)	24026175 (30.45%)	12636708 (13.36%)	49263060 (37.39%)	85925943 (28.15%)	95445114 (45.93%)	38436951 (32.67%)	26358863 (26.92%)	160240928 (37.85%)
PCR duplication rate over reads trimmed >= 18 nt	16.923	17.5284	28.6118	21.3226	14.3602	9.21725	8.16071	11.0628
Reads PCR deduplicated (% over reads trimmed >= 18 nt)	3203186 (5.91%)	2630737 (5.71%)	3302652 (3.50%)	9136575 (4.69%)	12025389 (6.96%)	9161495 (10.85%)	7837273 (12.25%)	29024157 (9.04%)
Reads mapped (% over reads PCR deduplicated)	2519128 (78.64%)	1721292 (65.43%)	1468815 (44.47%)	5709235 (62.49%)	3950647 (32.85%)	7274102 (79.40%)	6275705 (80.08%)	17500454 (60.30%)
UMI duplication rate over reads mapped	3.5642	2.94257	5.70387	3.68513	7.85461	7.00447	4.88347	6.19143
Reads mapped UMI deduplicated >= 18 nt (% over reads mapped)	706786 (28.06%)	584963 (33.98%)	257512 (17.53%)	1549261 (27.14%)	502972 (12.73%)	1038495 (14.28%)	1285092 (20.48%)	2826559 (16.15%)
RNA reads were quantified from raw fastq files after sequencing and, subsequently, after adapter trimming, PCR deduplication, genome-wide mapping and UMI deduplication.

## Sheet: Suppl_Table3
Supplemental Table 3: Number of untrimmed RNA reads present in each skeletal muscle and skin tissue sample and untrimmed reads mapped to the thylacine nuclear genome and mitochondrial genome assemblies.
	Muscle 1	Muscle 2	Muscle 3	Muscle merged	Skin 1	Skin 2	Skin 3	Skin merged
Reads untrimmed	3049045	3796570	5774456	12620071	15796821	4785718	3794524	24377063
PCR duplication rate over reads untrimmed	2.72606	2.68015	2.385	2.54633	2.13309	1.41508	1.45239	1.81917
Reads PCR deduplicated (% over reads untrimmed)	1118480 (36.68%)	1416552 (37.31%)	2421151 (41.93%)	4956183 (39.27%)	7405590 (46.88%)	3381937 (70.67%)	2612610 (68.85%)	13400137 (54.97%)
Reads mapped (% over reads PCR deduplicated)	130991 (11.71%)	26050 (1.84%)	63882 (2.64%)	220923 (4.45%)	370983 (5.01%)	326428 (9.65%)	241492 (9.24%)	938903 (7.07%)
UMI duplication rate over reads mapped	3.53371	1.76168	3.9487	3.24724	20.6687	7.62362	5.67762	9.089
Reads mapped UMI deduplicated (% over reads mapped)	37069 (28.30%)	14787 (56.76%)	16178 (25.32%)	68034 (30.79%)	17949 (4.84%)	42818 (13.12%)	42534 (17.61%)	103301 (11.01%)
RNA reads were quantified from raw fastq files after sequencing and, subsequently, after adapter trimming, PCR deduplication, genome-wide mapping and UMI deduplication.

## Sheet: Suppl_Table4
Supplemental Table 4: Metatranscriptomic classification of prokaryotic species using trimmed and untrimmed RNA reads >30 nt from skeletal muscle and skin tissues according to the KrakenUniq pipeline.
Trimmed RNA reads				Untrimmed RNA reads
Prokaryotic species	Skeletal muscle	Skin		Prokaryotic species	Skeletal muscle	Skin
uncultured bacterium	4780	11218		uncultured bacterium	1238	4699
Escherichia coli	6	2723		Rheinheimera sp. LHK132		3495
Acinetobacter baumannii	62	1480		Streptomyces sp. AgN23	2443
Myroides phaeus		1123		bacterium		2191
Succinivibrio dextrinosolvens		961		Corynebacterium maris		1344
Brochothrix thermosphacta		704		Paracoccus contaminans		908
Cutibacterium granulosum		685		Proteus mirabilis	50	835
Asticcacaulis excentricus	38	663		Glutamicibacter creatinolyticus		796
Proteus mirabilis	622	88		Rothia mucilaginosa		439
Cutibacterium acnes		553		Hydrogenophaga sp. RAC07	315
Dermacoccus nishinomiyaensis		542		Escherichia coli	11	306
Kurthia zopfii		512		Leptospira biflexa		233
Kocuria palustris		434		[Ruminococcus] torques	232
Paludibacter propionicigenes	427	147		Pseudoclostridium thermosuccinogenes	231	1
Ornithinimicrobium flavum		422		Kurthia zopfii		210
Myroides sp. CJ210		365		uncultured bacterium 246	198
Clostridium disporicum	332			Paeniclostridium sordellii		178
Bradymonadales bacterium V1718		330		Acinetobacter sp. dk386		177
Limnobacter sp. SAORIC-580	314	5		Kurthia sp. 11kri321		170
uncultured Burkholderia sp.	1	311		[Clostridium] cellulosi	167
Clostridium baratii		301		Devosia sp. I507		144
Wohlfahrtiimonas chitiniclastica	142	280		Pseudomonas aeruginosa	3	142
Candidatus Xiphinematobacter sp. Idaho Grape	275			Clostridium perfringens	1	140
Acinetobacter indicus		271		Romboutsia ilealis		139
Proteobacteria bacterium		268		Carnobacterium inhibens	137
uncultured Gammaproteobacteria bacterium	83	267		uncultured Chroococcidiopsis sp.		137
Brachybacterium saurashtrense	250	1		Novosphingobium sp. P6W	131
bacterium IS423	91	246		Xenorhabdus bovienii		131
Xenorhabdus poinarii		246		uncultured Enterobacteriaceae bacterium		130
Brevibacterium sandarakinum	244			Acinetobacter baumannii		125
unknown marine alpha proteobacterium JP57	244			Acinetobacter parvus		125
Neomicrococcus aestuarii	242	98		Lachnospiraceae bacterium oral taxon 500	1	124
Pasteurella multocida	25	241		Psychrobacter sp. DAB_AL43B		123
Staphylococcus aureus	4	239		Neomicrococcus aestuarii	8	119
Salmonella enterica	2	238		Enterococcus sulfureus		119
Vogesella sp. LIG4		229		Xenorhabdus poinarii		115
Lactococcus raffinolactis		223		Carnobacterium sp. 17-4	111
Streptacidiphilus rugosus		221		uncultured Mollicutes bacterium		111
Candidatus Mycoplasma haemolamae	6	219		Luteibacter pinisoli	109
Janibacter limosus	55	214		Candidatus Mycoplasma haemolamae	9	107
uncultured Firmicutes bacterium	209	6		Pasteurella multocida	25	104
uncultured rumen bacterium		205		Brevibacterium aurantiacum	103
Paraflavitalea soli	202			uncultured Acidovorax sp.	102
Candidatus Westeberhardia cardiocondylae		201		Granulosicoccus antarcticus		101
Psychrobacter sp. ALBL_215		196		Methylocella silvestris	91
Mycolicibacterium madagascariense		191		Lactobacillus bombi		89
Vitreoscilla sp. C1		189		Myroides phaeus		83
Micrococcus luteus	120	187		uncultured gamma proteobacterium HF0010_01E20		81
Hydrogenophaga sp. NH-16	181			Providencia rettgeri	79	4
Klebsiella pneumoniae		181		Aeromonas veronii		77
Defluviimonas alba	180			Staphylococcus cohnii		76
uncultured beta proteobacterium CBNPD1 BAC clone 578	179			uncultured proteobacterium	73	6
Clostridium perfringens	135	178		uncultured bacterium zdt-33i5		71
Acinetobacter sp. Marseille-Q1620		178		Chitinophaga sp. MD30		71
uncultured actinobacterium	2	177		Brachybacterium ginsengisoli		69
Pseudomonas chlororaphis		175		Gammaproteobacteria bacterium DM2	67
Pseudomonas sp. C27(2019)		174		Acinetobacter sp. TTH0-4		67
Sphingobium sp. RAC03		172		uncultured Acinetobacter sp.	1	66
Protaetiibacter intestinalis		172		Sphaerotilus natans		66
uncultured beta proteobacterium	117	170		Moraxella osloensis		64
Clostridium beijerinckii	168	66		Gardnerella vaginalis		62
Corynebacterium maris		165		Flavobacterium columnare		60
Buchnera aphidicola		164		Pseudomonas pohangensis		59
Brachybacterium vulturis	163	109		Candidatus Arsenophonus arthropodicus		57
Paeniclostridium sordellii		162		uncultured marine bacterium Ant4E12	56	32
Winogradskyella sp. J14-2		162		Litoreibacter sp. LN3S51		56
Carnobacterium inhibens	156			Euzebya sp. DY32-46		54
Candidatus Saccharibacteria bacterium GW2011_GWC2_44_17		156		Pontibacter actiniarum	53
Confluentimicrobium sp. EMB200-NS6		153		bacterium IS423	40	50
uncultured Bacillus sp.		152		Salmonella enterica	7	48
uncultured proteobacterium		150		uncultured Nocardia sp.		37
Pedobacter cryoconitis		148		Klebsiella pneumoniae	1	34
Kytococcus sedentarius	58	147		Clostridium carboxidivorans		31
unidentified thrip gut bacterium thrips6.12		147		Moraxellaceae bacterium HYN0046	30	2
Saccharophagus degradans		147		Acinetobacter sp. Marseille-Q1620		29
Devriesea agamarum		147		Legionella lansingensis	27
Comamonas testosteroni		145		Acinetobacter sp. 10FS3-1		27
Bacillus thermoamylovorans		145		Vibrio cholerae		26
Clostridium estertheticum	142			Atypical aster yellows phytoplasma	3	25
Dyella thiooxydans		140		uncultured beta proteobacterium		25
Streptomyces sp. SCSIO 3032		139		Dietzia cinnamea		24
Pseudomonas graminis		136		Chryseobacterium sp. H3001		24
Bremerella volcania		136		uncultured marine bacterium	5	22
Gloeobacter violaceus		135		Rhodococcus erythropolis		22
Porphyromonas crevioricanis		135		bacterium DM-P2		22
uncultured marine bacterium	1	134		Staphylococcus aureus	6	21
Flavobacterium sp. CJ74	133			uncultured Gammaproteobacteria bacterium	1	21
Vagococcus teuberi		133		Paludibacter propionicigenes	21
Prevotella intermedia		133		Acinetobacter calcoaceticus		21
Rathayibacter tanaceti		131		Stenotrophomonas maltophilia		19
Thermobispora bispora	2	129		Paenibacillus alvei		19
Egibacter rhizosphaerae		129		Pectobacterium carotovorum	18	2
Lachnoanaerobaculum umeaense	128	65		Xanthomonas citri		18
Pseudomonas andersonii		128		Arthrobacter sp. S10105		18
Conchiformibius steedae		128		Bremerella volcania		18
Clostridioides difficile		128		Algoriphagus sanaruensis	17
Clostridium isatidis	127			Pseudomonas putida		17
Acinetobacter guillouiae		127		Corynebacterium argentoratense		17
Pseudomonas sp. StFLB209	110	126		uncultured actinobacterium	1	16
Treponema sp. OMZ 804	126			Photobacterium damselae	1	16

## Sheet: Suppl_Table5
Supplemental Table 5: Metatranscriptomic classification of viral species using trimmed and untrimmed RNA reads >30 nt from skeletal muscle and skin tissues according to the KrakenUniq pipeline.
Trimmed RNA reads				Untrimmed RNA reads
Viral species	Skeletal muscle	Skin		Viral species	Skeletal muscle	Skin
Primate T-lymphotropic virus 1	559	3244		Primate T-lymphotropic virus 1	242	1269
Penicillium aurantiogriseum partitivirus 1	1035			Human immunodeficiency virus 1	7	151
Columbid alphaherpesvirus 1	79	394		Uukuniemi phlebovirus	9	87
Penicillium digitatum partitivirus 1	351			Cannabis cryptic virus	85
Cannabis cryptic virus	183			Penicillium aurantiogriseum partitivirus 1	62
Uukuniemi phlebovirus	30	182		Columbid alphaherpesvirus 1	11	52
Penicillium digitatum narna-like virus 1		181		Escherichia virus phiX174	24	2
Mimiviridae sp. ChoanoV1	4	173		Mimiviridae sp. ChoanoV1	1	21
Human immunodeficiency virus 1	5	128		Choristoneura fumiferana granulovirus	3	17
Dishui Lake phycodnavirus 3	100			Enterobacteria phage phiX174 sensu lato	10	8
Choristoneura fumiferana granulovirus	4	9		West Nile virus	1	6
Xestia c-nigrum granulovirus	7	1		Ginkgo biloba picorna-like virus	1	3
Ginkgo biloba picorna-like virus	4	5		Lassa mammarenavirus		2
West Nile virus	1	3		Penicillium brevicompactum partitivirus 1	1
Diolcogaster facetosa bracovirus		2		Tete orthobunyavirus	1
Penicillium brevicompactum partitivirus 1	1			Orthohepevirus A	1
Singapore grouper iridovirus	1			Megaviridae environmental sample		1
Simbu orthobunyavirus		1
Influenza A virus		1
Apple chlorotic leaf spot virus		1
Kammavanpettai virus		1

## Sheet: Suppl_Table6
Supplemental Table 6: Number of trimmed RNA reads mapped to protein-coding and other noncoding RNA genes annotated in the thylacine genome.
	Muscle 1	Muscle 2	Muscle 3	Muscle merged	Skin 1	Skin 2	Skin 3	Skin merged
Trimmed reads mapped	706786	584963	257512	1549261	502972	1038495	1285092	2826559
Intergenic reads (% over reads mapped)*	196163 (27.75%)	149595 (25.57%)	104353 (40.52%)	450111 (29.05%)	286591 (56.98%)	358451 (34.52%)	370645 (28.84%)	1063492 (37.62%)
Genic reads (% over reads mapped)	510623 (75.25%)	435368 (74.43%)	153159 (59.48%)	1099150 (70.95%)	216381 (43.02%)	680044 (65.48%)	914447 (71.16%)	1763067 (62.38%)
rRNAs (% over genic reads)	263481 (51.60%)	305393 (70.15%)	42859 (27.98%)	611733 (55.66%)	73983 (34.19%)	344359 (50.64%)	468104 (51.19%)	838641 (47.57%)
tRNAs (% over genic reads)	145317 (28.46%)	42379 (9.73%)	64223 (41.93%)	251919 (22.92%)	37612 (17.38%)	166996 (24.56%)	242932 (26.57%)	447540 (25.38%)
PC mRNAs (% over genic reads)	81930 (16.05%)	79695 (18.31%)	39703 (25.92%)	201328 (18.32%)	98072 (45.32%)	135177 (19.88%)	145085 (15.87%)	378334 (21.46%)
lncRNAs (% over genic reads)	7902 (1.55%)	4008 (0.92%)	4741 (3.10%)	16651 (1.51%)	4755 (2.20%)	11841 (1.74%)	17686 (1.93%)	34282 (1.94%)
snRNAs (% over genic reads)	6378 (1.25%)	3037 (0.70%)	1237 (0.81%)	10652 (0.97%)	1505 (0.70%)	15975 (2.35%)	30697 (3.36%)	48177 (2.73%)
snoRNAs (% over genic reads)	1883 (0.37%)	713 (0.16%)	173 (0.11%)	2769 (0.25%)	332 (0.15%)	3845 (0.57%)	5856 (0.64%)	10033 (0.57%)
microRNAs (% over genic reads)	3732 (0.73%)	143 (0.03%)	223 (0.15%)	4098 (0.37%)	122 (0.06%)	1851 (0.27%)	4087 (0.45%)	6060 (0.34%)
*Novel annotated miRNAs (N = 325), as well as 28S, 18S and 5.8S novel rRNA annotations were included prior to intergenic reads quantification.
PC mRNAs: protein coding mRNA genes; rRNAs: ribosomal RNAs including 5S, 5.8S, 18S and 28S genes; tRNAs: transfer RNA genes; lncRNAs: long non-coding RNA genes; snRNAs: small nuclear RNA genes; snoRNAs: small nucleolar RNA genes.

## Sheet: Suppl_Table7
Supplemental Table 7: Number of utrimmed RNA reads mapped to protein-coding and other noncoding RNA genes annotated in the thylacine genome.
	Muscle 1	Muscle 2	Muscle 3	Muscle merged	Skin 1	Skin 2	Skin 3	Skin merged
Untrimmed reads mapped	37069	14787	16178	68034	17949	42818	42534	103301
Intergenic reads (% over total reads mapped)	5406 (14.58%)	4849 (32.79%)	5532 (34.19%)	15845 (23.29%)	5495 (30.61%)	9100 (21.25%)	13790 (32.42%)	28385 (27.48%)
Genic reads (% over total reads mapped)	31663 (85.42%)	9938 (67.21%)	10646 (65.81%)	52189 (76.71%)	12454 (69.39%)	33718 (78.75%)	28744 (67.58%)	74916 (72.52%)
rRNAs (% over total genic reads)	25509 (80.56%)	7234 (72.79%)	6817 (64.03%)	39560 (75.80%)	9473 (76.06%)	28531 (84.62%)	23655 (82.30%)	61659 (82.30%)
tRNAs (% over total genic reads)	1392 (4.40%)	307 (3.09%)	1121 (10.53%)	2820 (5.40%)	581 (4.67%)	1233 (3.66%)	1151 (4%)	2965 (3.96%)
PC mRNAs (% over total genic reads)	3806 (12.02%)	2230 (22.44%)	2433 (22.85%)	8469 (16.23%)	2036 (16.35%)	3000 (8.90%)	3104 (10.80%)	8140 (10.87%)
lncRNAs (% over total genic reads)	141 (0.45%)	116 (1.17%)	157 (1.47%)	414 (0.79%)	238 (1.91%)	166 (0.49%)	187 (0.65%)	591 (0.79%)
snRNAs (% over total genic reads)	522 (1.65%)	44 (0.44%)	87 (0.82%)	653 (1.25%)	77 (0.62%)	498 (1.48%)	420 (1.46%)	995 (1.33%)
snoRNAs (% over total genic reads)	249 (0.79%)	7 (0.07%)	17 (0.16%)	273 (0.52%)	49 (0.39%)	289 (0.86%)	227 (0.79%)	565 (0.75%)
microRNAs (% over total genic reads)	44 (0.14%)	0 (0%)	14 (0.13%)	58 (0.11%)	0 (0%)	0 (0%)	0 (0%)	0 (0%)
PC mRNAs: protein coding mRNA genes; rRNAs: ribosomal RNAs including 5S, 5.8S, 18S and 28S genes; tRNAs: transfer RNA genes; lncRNAs: long non-coding RNA genes; snRNAs: small nuclear RNA genes; snoRNAs: small nucleolar RNA genes.

## Sheet: Suppl_Table8
Supplemental Table 8: Number of trimmed RNA reads of 42 nt mapped to the thylacine and human genome.
	Muscle 1	Muscle 2	Muscle 3	Muscle merged	Skin 1	Skin 2	Skin 3	Skin merged
Trimmed reads mapped to thylacine	706786	584963	257512	1549261	502972	1038495	1285092	2826559
Trimmed reads 42 nt mapped to thylacine (% over reads mapped)	54572 (7.72%)	9493 (1.62%)	8356 (3.24%)	72421 (4.67%)	18287 (3.64%)	66807 (6.43%)	69242 (5.39%)	154336 (5.46%)
Trimmed reads 42 nt mapped to thylacine rRNAs (% over reads 42 nt mapped)	33944 (62.20%)	6210 (65.41%)	4532 (54.24%)	44686 (61.70%)	9353 (51.15%)	35430 (53.03%)	34506 (49.83%)	79289 (51.37%)
Trimmed reads 42 nt mapped to thylacine and human (% over reads 42 nt mapped)	33808 (61.95%)	3884 (40.91%)	4276 (51.17%)	41968 (57.95%)	9828 (53.74%)	40833 (61.12%)	37415 (54.04%)	88076 (57.07%)
Trimmed reads 42 nt mapped to thylacine but not human (% over reads 42 nt mapped)	20764 (38.05%)	5609 (59.09%)	4080 (48.83%)	30453 (42.05%)	8459 (46.26%)	25974 (38.88%)	31827 (45.96%)	66260 (42.93%)

## Sheet: Suppl_Table9
Supplemental Table 9: Number of RNA reads mapped to exonic and intronic regions of protein-coding genes with breadth of coverage >10% of the coding sequence in skeletal muscle (N = 236) and skin (N = 270) tissues.
Skeletal muscle (236 protein-coding genes):
Exonic fraction = 12.28%
Intronic fraction = 87.72%
Reads >= 18 nts					Reads > 30 nts
Gene region	236 protein-coding genes				Gene region	236 protein-coding genes
	RNA Muscle	DNA SRR5055304				RNA Muscle	DNA SRR5055304
Total reads	9928	9927			Total reads	2432	2431
Exonic reads	9213 (92.80%)	1530 (15.41%)			Exonic reads	2285 (93.96%)	375 (15.43%)
Intronic reads	715 (7.20%)	8397 (84.59%)			Intronic reads	147 (6.04%)	2056 (84.57%)
Exonic enrichment fold change: 9213/1530 = 6.02					Exonic enrichment fold change: 2285/375 = 6.09
Intronic depletion fold change: -(8397/715) = -11.74					Intronic depletion fold change: -(2056/147) = -13.99
X2 = 11971; df = 1; P-value = 2.2e-16					X2 = 3025.7; df = 1; P-value = 2.2e-16
Skin (270 protein-coding genes):
Exonic fraction = 9.34%
Intronic fraction = 90.66%
Reads >= 18 nts					Reads > 30 nts
Gene region	270 protein-coding genes				Gene region	270 protein-coding genes
	RNA Skin	DNA SRR5055304				RNA Skin	DNA SRR5055304
Total reads	7020	7019			Total reads	1712	1711
Exonic reads	5390 (76.78%)	671 (9.56%)			Exonic reads	1275 (74.47%)	163 (9.53%)
Intronic reads	1630 (23.22%)	6348 (90.44%)			Intronic reads	437 (25.53%)	1548 (90.47%)
Exonic enrichment fold change: 5390/671 = 8.03					Exonic enrichment fold change: 1275/163 = 7.82
Intronic depletion fold change: -(6348/1630) = -3.89					Intronic depletion fold change: -(1548/437) = -3.54
X2 = 6464.3; df = 1; P-value = 2.2e-16					X2 = 1481.7; df = 1; P-value = 2.2e-16

[truncated: 27 more sheets: Suppl_Table10, Suppl_Table11, Suppl_Table12, Suppl_Table13, Suppl_Table14, Suppl_Table15, Suppl_Table16, Suppl_Table17, Suppl_Table18, Suppl_Table19, Suppl_Table20, Suppl_Table21, Suppl_Table22, Suppl_Table23, Suppl_Table24, Suppl_Table25, Suppl_Table26, Suppl_Table27, Suppl_Table28, Suppl_Table29 …]
